# Supplementary material
Source: publisher site journal article supplement (https://www.spandidos-publications.com/1234/downloadSupplementary)
Supplement: Supplementary file 1 [file downloadSupplementary]

Video S1. Cell migration for A549 control cells.

Video S2. Cell migration for A549 cells treated with LDN-91946.

Video S3. Cell migration for A549 cells treated with RA-9.

Video S4. Cell migration for A549 cells treated with PR-619.

Video S5. Cell migration for H2373 control cells.

Video S6. Cell migration for H2373 cells treated with LDN-91946.

Video S7. Cell migration for H2373 cells treated with RA-9.

Video S8. Cell migration for H2373 cells treated with PR-619.
